# Supplementary material
Source: Research Square preprint supplement (doi:10.21203/rs.3.rs-10289655/v1)
Supplement: Supplementary file 1 [file 0721ddb77af03d01162b0e39.docx]

Highlights:

- Red rice exhibited superior nutritional composition and water absorption properties compared to white rice.
- The antinutritional content is higher in red rice compared to white rice
- Red rice demonstrates strong potential as a functional health-promoting cereal.
